# Supplementary material
Source: publisher site journal article supplement (https://www.dovepress.com/article/480676)
Supplement: Supplementary file 1 [file get_supplementary_file.php]

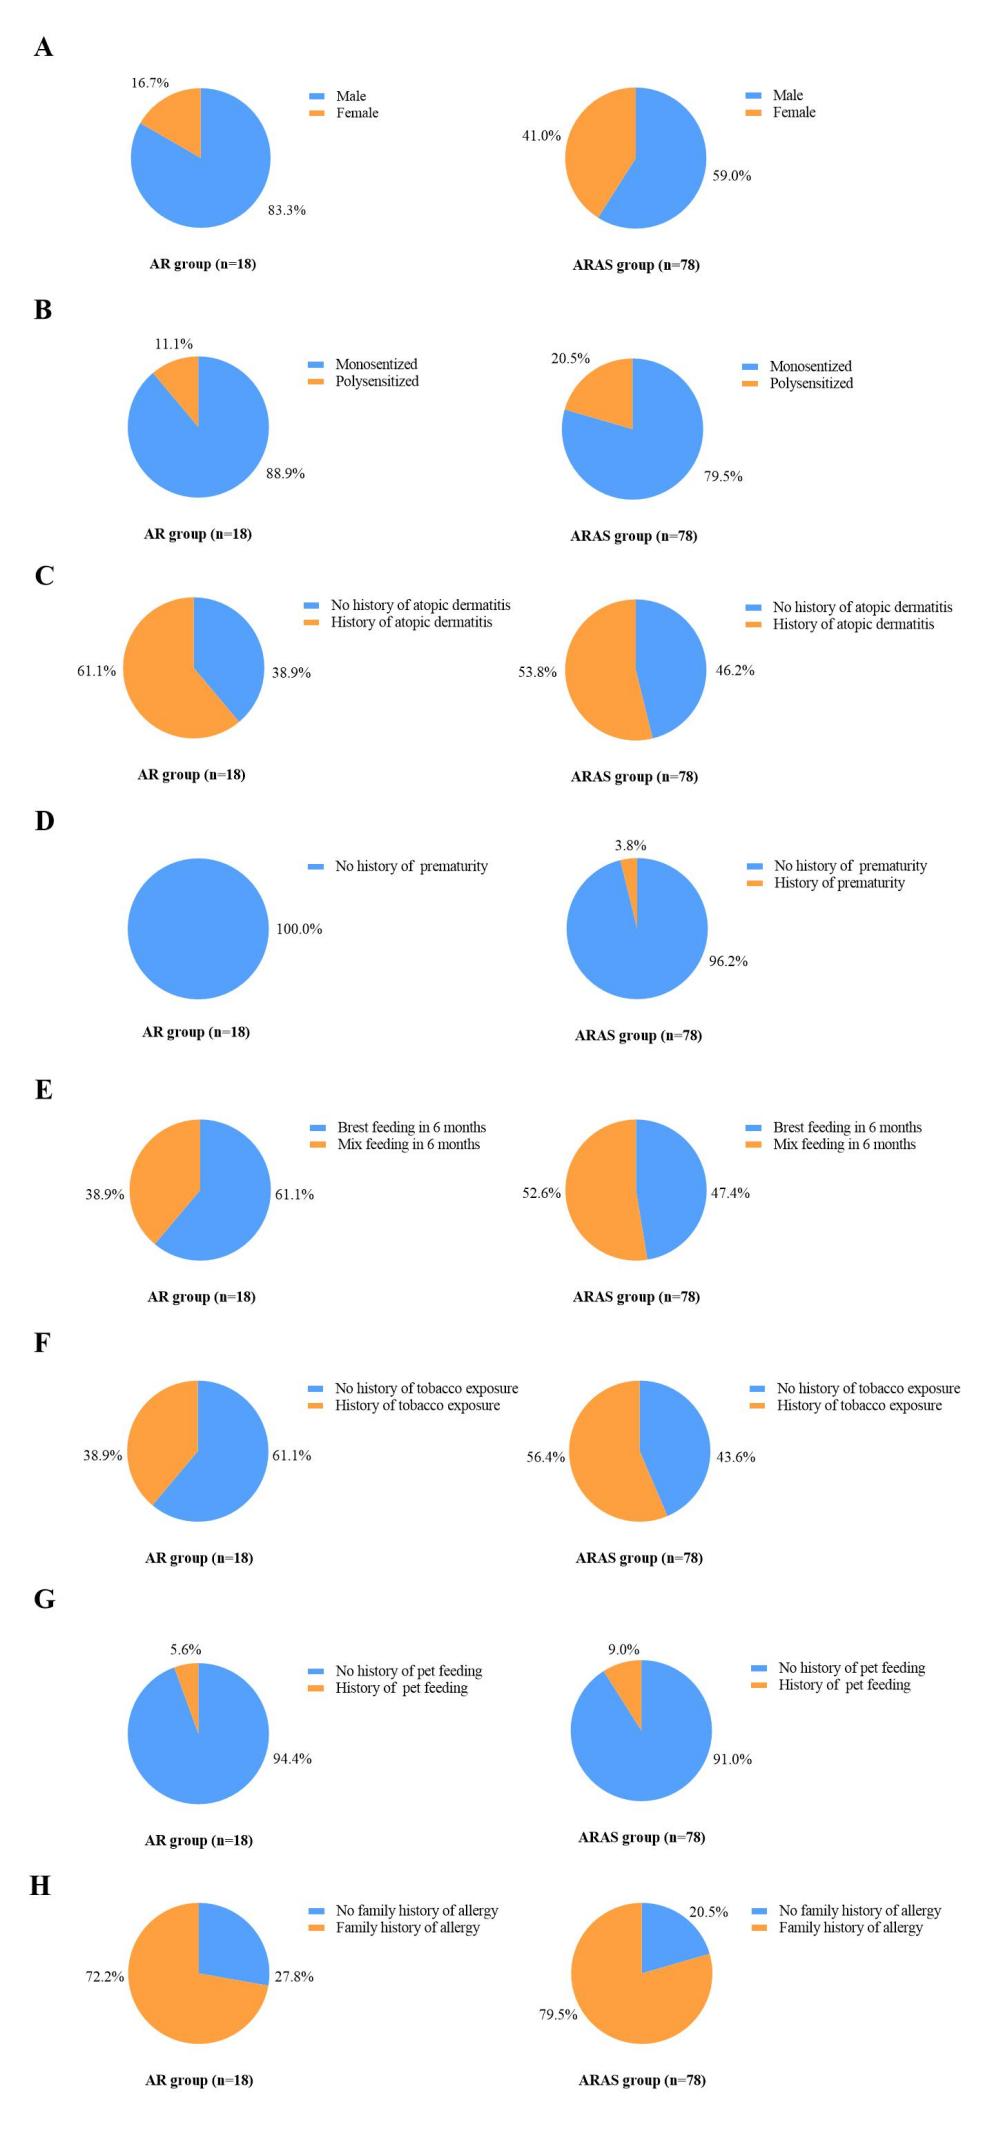


Supplementary Figure 1 Demographic and clinical data in AR and ARAS children: (A) the ratio of gender; (B) the ratio of mono-/polysensitization of inhaled allergens ; (C) the ratio of atopic dermatitis history; (D) the ratio of prematurity history; (E) the ratio of feeding style in 6 months; (F) the ratio of tobacco exposure history; (G) the ratio of pet feeding history; (H) the ratio of family history of allergy.
